# Supplementary material for: Healthcare seeking behavior and antibiotic use for diarrhea among children in rural Bangladesh before seeking care at a healthcare facility
Source: Research Square preprint supplement (doi:10.21203/rs.3.rs-5687932/v1), 2025-04-17
Supplement: Supplementary file 1 [file d895f7b6f3fe7d3e3ebba515.docx]

**Supplementary Information**


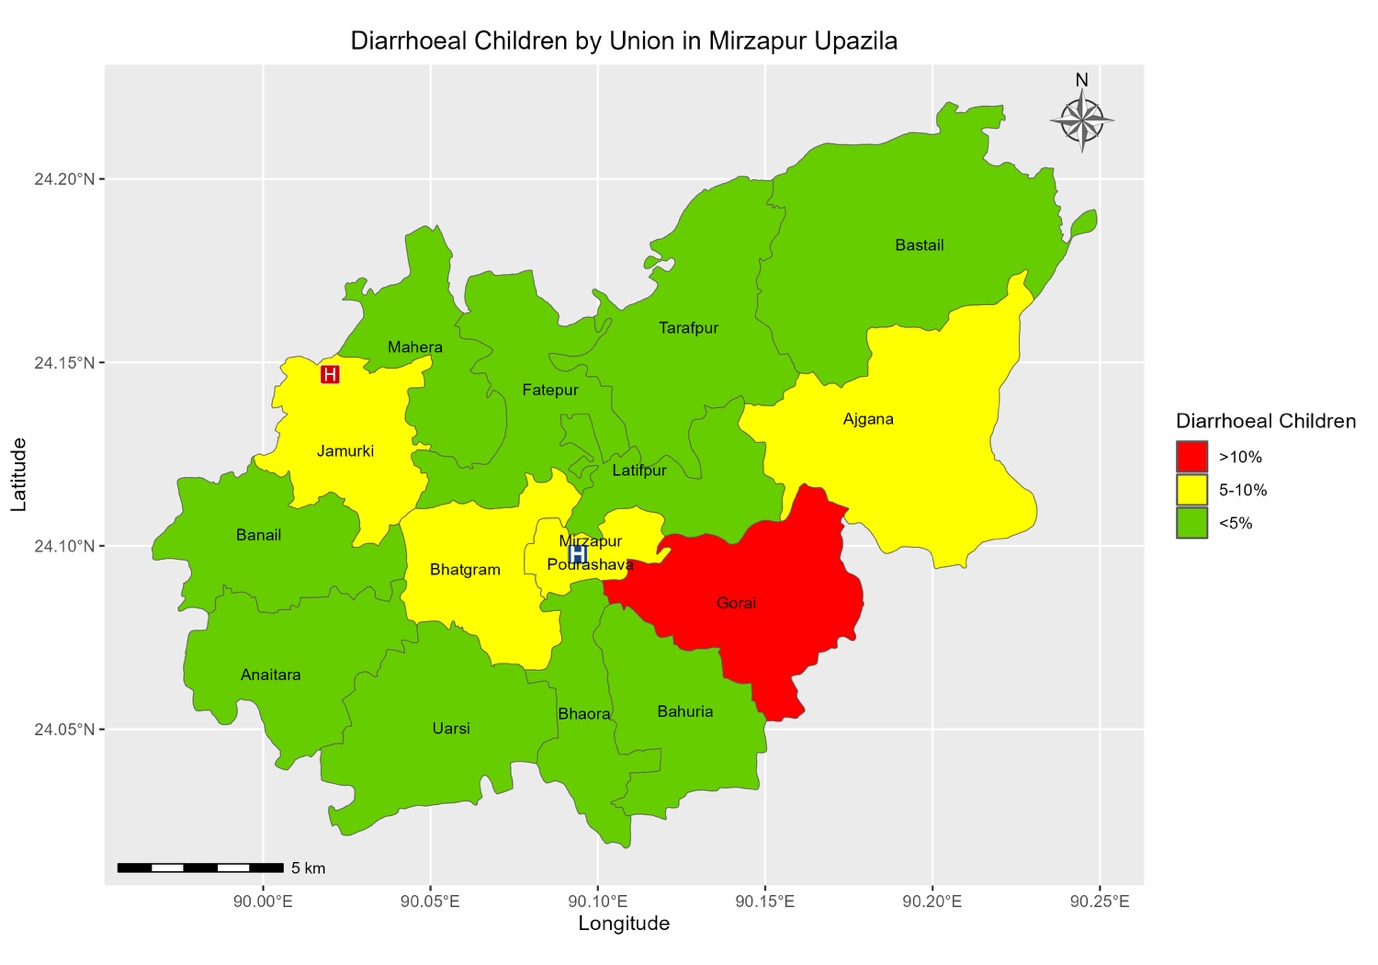


Figure S1a. Union-wise distribution of the under-5 diarrheal children visited Kumudini Hospital

The proportion of children with diarrhea per union was calculated with diarrhea from a union / total children with diarrhea


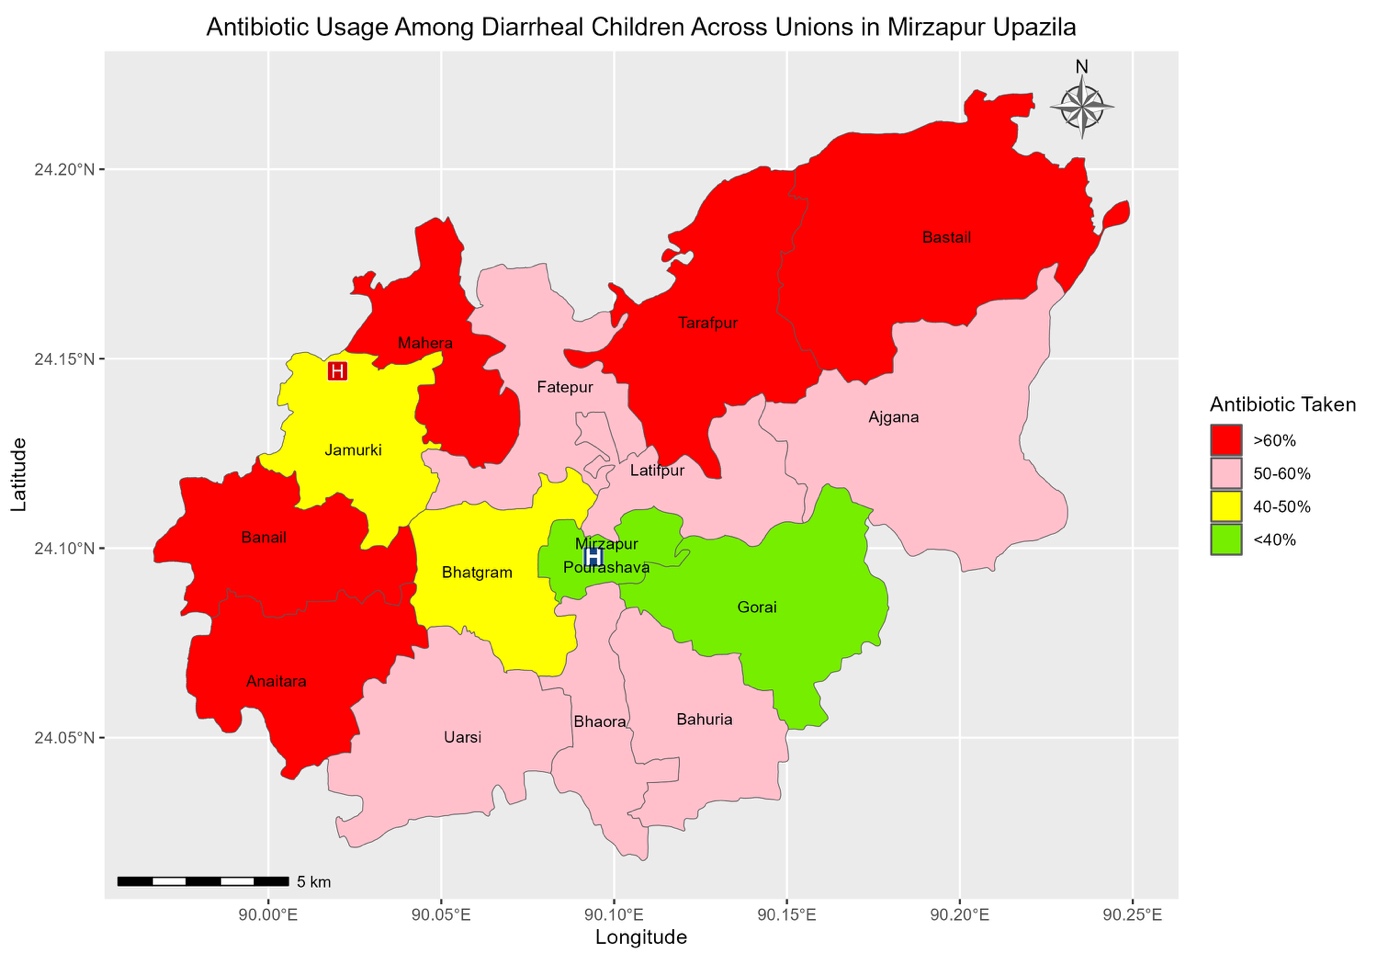


Figure S 1b. Union-wise distribution of the proportion of children received antibiotics before visiting Kumudini Hospital

Proportion of children received antibiotic from each union were calculated by the number of children received antibiotic from that union / the total number of diarrhoeal children visited Kumudini Hospital from that union.
